# Supplementary material for: An asymmetrical A–DAD–A-type acceptor simultaneously enhances voltage and current for efficient organic solar cells
Source: Royal Society of Chemistry journal article supplement (doi:10.1039/d0ta03128c), 2020-01-01
Supplement: d0ta03128c1.pdf [file d0ta03128c1.pdf]

## Supplementary information

### **An asymmetrical A-DAD-A-Type Acceptor Simultaneously Enhances Voltage and Current for Efficient Organic Solar Cells**

Hanjian Lai, ‡,<sup>a, b</sup> Hui Chen, ‡,<sup>a</sup> Yulin Zhu, <sup>a</sup> Lin Chen, <sup>a</sup> Hsin-Hsiang Huang, <sup>d</sup> and Feng He<sup>\*a, c</sup>

<sup>a</sup> Shenzhen Grubbs Institute and Department of Chemistry, Southern University of Science and Technology, Shenzhen 518055, China

<sup>b</sup> School of Chemistry and Chemical Engineering, Harbin Institute of Technology, Harbin, 150001, China

<sup>c</sup> Guangdong Provincial Key Laboratory of Catalysis, Southern University of Science and Technology, Shenzhen 518055, China

<sup>d</sup> Department of Materials Science and Engineering, and Center for Condensed Matter Sciences, National Taiwan University, Taipei 10617, Taiwan

‡ These authors contributed equally

\*E-mail: [hef@sustech.edu.cn](mailto:hef@sustech.edu.cn) (F.H.)

## GENERAL METHODS

**Instruments.**  $^1\text{H}$  NMR spectra were recorded on Bruker AV 400 MHz spectrometer in  $\text{CDCl}_3$  with tetramethylsilane (TMS) as an internal standard. Preparative gel permeation chromatography purification was performed with a JAI LC-9104 recycling preparative high performance liquid chromatography, and the eluent was chloroform. Cyclic voltammetry (CV) measurements were performed on a CHI 660E potentiostat/galvanostat (Shanghai Chenhua Instrumental Co., Ltd. China) to determine the HOMO and LUMO levels of the polymers, in an acetonitrile solution of  $0.1 \text{ mol}\cdot\text{L}^{-1}$  tetrabutylammonium hexafluorophosphate ( $[\text{n-Bu}_4\text{N}]^+ [\text{PF}_6]^-$ ) at a potential scan rate of  $100 \text{ mV s}^{-1}$  with an  $\text{Ag}/\text{Ag}^+$  reference electrode and a platinum wire counter electrode under a argon atmosphere. Solution and film UV-Vis absorption spectra were recorded on a Shimadzu UV3600 spectrometer. Thermogravimetric analysis (TGA) plots were measured with a Discovery series instrument under a nitrogen atmosphere at heating and cooling rates of  $10 \text{ }^\circ\text{C min}^{-1}$ . Differential scanning calorimetry (DSC) measurements were performed on a Discovery series thermal analyzer at a scanning rate of  $10 \text{ }^\circ\text{C min}^{-1}$  in  $\text{N}_2$ . Atom force microscopy (AFM) images were taken on a NanoScopeIIIa controller (Veeco Metrology Group/Digital Instruments, Santa Barbara, CA), using built-in software (version V6.13R1) to capture images. Transmission electron microscopy (TEM) images were acquired using a HITACHI H-7650 electron microscope operating at an acceleration voltage of 100 kV.

**Fabrication and Characterization of OSCs.** The fabrication and measurement methods of OSCs devices are as follows: After a thorough cleaning of the indium-tin oxide (ITO)-coated glass substrate with detergent, deionized water, acetone, and isopropyl alcohol under ultrasonication for 15 minutes each and subsequently dried in an oven at 80 °C. The ITO glass substrates were treated with UV-ozone for 15 minutes and then the sol-gel-derived ZnO films were spin-coated onto the ITO substrates followed by thermal treatment at 200 °C for 30 min. The total concentration of the **PBDB-TF: BDIC- $\gamma$ CI-2F** (1:1.2) blend solution for spin-coating was 11 mg mL<sup>-1</sup> with chloroform as the processing solvent. The additive, chloronaphthalene (CN) (volume content: 0.5%) was added into solution 30 minutes before the spin-coating process. The total concentration of the **PBDB-TF: ITIC- $\gamma$ CI-2F** (1:1.2) blend solution for spin-coating was 7 mg mL<sup>-1</sup> with chlorobenzene as the processing solvent. The additive, 1, 8-diiodoctane (DIO) (volume content: 0.5%) was added into solution 30 minutes before the spin-coating process. The blend was stirred at room temperature in the glove box overnight. The active layer was spin-coating at 3000 rpm for 30 s to get neat film. A 10 nm MoO<sub>3</sub> layer and a 100 nm Ag layer were subsequently evaporated through a shadow mask to define the active area of the devices. The integrated device structure is ITO/ZnO/**PBDB-TF: Acceptors**/MoO<sub>3</sub>/Ag. A solar simulator (Enlitech.Inc) with an AM 1.5G filter was used as a light source to produce an intensity of 100 mW cm<sup>-2</sup> for the illumination of

the photovoltaic cells. The light intensity was calibrated by a 2 cm × 2 cm calibrated silicon solar cell with KG-3 visible color filter. A shadow mask with a single aperture (4.15 mm<sup>2</sup>) was placed onto the devices in order to accurately define the photoactive area.

Steady-state current-voltage ( $J$ - $V$ ) curves were measured by a Keithley 2400 source-measurement unit under AM 1.5 G spectrum from a solar simulator (Enlitech.Inc) calibrated by a silicon reference cell (Hamamatsu S1133 color, with KG-5 visible filter). The relationship of  $J_{sc}$  to the light intensity were measured by steady-state current-voltage measurement, the light intensity was modulated by neutral density filters (NDF) with different values of optical density (OD). The external quantum efficiency (EQE) was measured by a solar cells-photodetector responsibility measurement system (Enlitech.Inc).

**Electron-only and hole-only devices fabrication.** Electron-only devices were fabricated with the device structure of ITO/ZnO/PBDB-TF: Acceptors/Ca/Al, while the hole-only devices were fabricated with the device structure of ITO/PEDOT: PSS/blends/MoO<sub>3</sub>/Ag. The mobilities were determined by fitting the dark current to the model of a single carrier SCLC,<sup>1,2</sup> which is described by the equation:

$$J = \frac{9}{8} \varepsilon_0 \varepsilon_r \mu_h \frac{V^2}{d^3}$$

where  $J$  is the current,  $\mu_h$  is the zero-field mobility,  $\varepsilon_0$  is the permittivity of free space,  $\varepsilon_r$  is the relative permittivity of the material,  $d$  is the thickness of the active layer, and  $V$  is the effective voltage.

## EXPERIMENTAL SECTION

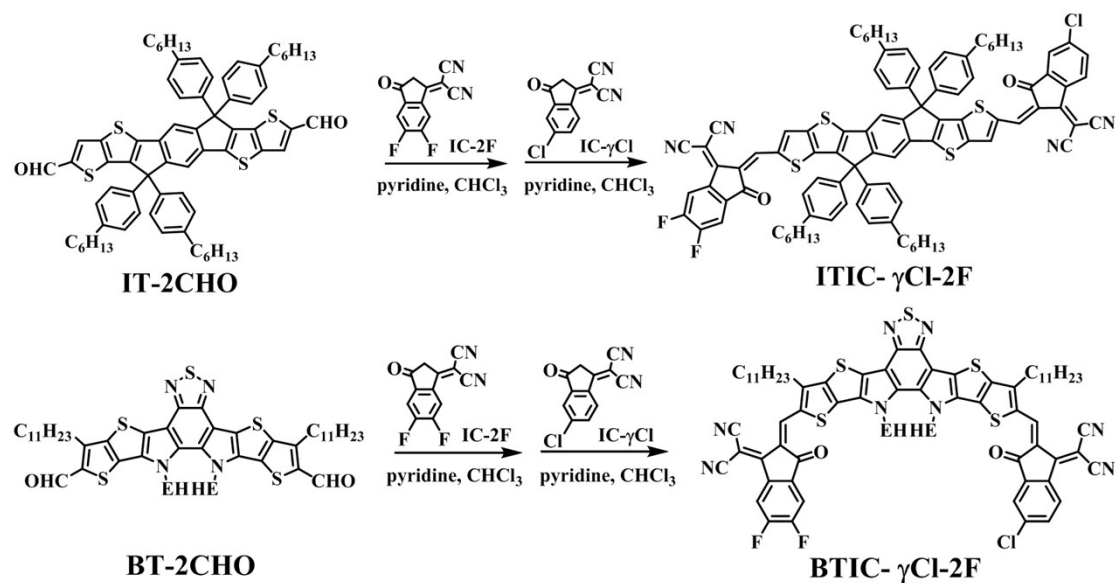

**Scheme S1.** The synthetic routes of **ITIC- $\gamma$ Cl-2F** and **BTIC- $\gamma$ Cl-2F**.

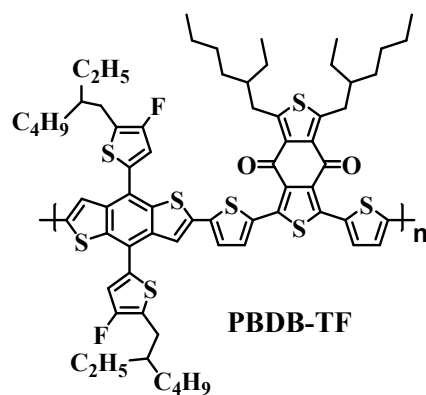

**Scheme S2.** The structure of polymer donor **PBDB-TF**.

**Materials:** Compound **IT-2HO**, **BT-2CHO**, **IC-2F** and **IC- $\gamma$ Cl** were synthesized according previously reported approaches.<sup>3-5</sup> All the other chemicals were purchased as reagent grade from J&K, Energy, Macklin, and Sigma-Aldrich, and used without

further purification. All solvents for reactions were freshly distilled immediately prior to use.

**Compound ITIC- $\gamma$ Cl-2F**: A mixture of **IT-2CHO** (200 mg, 0.186 mmol), **IC-2F** (42.8 mg, 0.186 mmol) in chloroform/pyridine (30 ml/0.5 ml) was reacted 6 hours under Argon at 50 °C, then the **IC- $\gamma$ Cl** (42.5mg, 0.186mmol) was added for further 6 hours. The reaction mixture was then cooled to room temperature and then extracted with chloroform. The organic layer was washed with brine and dried over MgSO<sub>4</sub>. The crude product was purified by flash column chromatography with chloroform as eluent and further purified with cycling preparative HPLC to get the product (103 mg, 37%). <sup>1</sup>H NMR (400 MHz, CDCl<sub>3</sub>)  $\delta$  : 8.85-8.87 (d, 2H), 8.60-8.63 (d, 1H), 8.51-8.55 (dd, 1H), 8.23 (s, 2H), 7.85-7.86 (s, 1H), 7.65-7.71 (m, 4H), 7.13-7.22 (m, 16H), 2.55-2.59(t, 8H), 1.57-1.63(m, 8H), 1.26-1.37(m, 24H), 0.84-0.87(m, 12H). MALDI-TOF-MS calcd for C<sub>94</sub>H<sub>79</sub>ClF<sub>2</sub>N<sub>4</sub>O<sub>2</sub>S<sub>4</sub> (M<sup>+</sup>): 1496.474, found: 1497.561.

**Compound BTIC- $\gamma$ Cl-2F**: A mixture of **BT-2CHO** (200 mg, 0.194 mmol), **IC-2F** (44.6 mg, 0.194 mmol) in chloroform/pyridine (30 ml/0.5 ml) was reacted 6 hours under Argon at 50 °C, then the **IC- $\gamma$ Cl** (44.3mg, 0.194mmol) was added for further 6 hours. The reaction mixture was then cooled to room temperature and then extracted with chloroform. The organic layer was washed with brine and dried over MgSO<sub>4</sub>. The crude product was purified by flash column chromatography with chloroform as eluent and further purified with cycling preparative HPLC to get the product (110 mg, 39.1%). <sup>1</sup>H NMR (400 MHz, CDCl<sub>3</sub>)  $\delta$  : 9.13-9.15 (d, 2H), 8.61-8.63 (d, 1H), 8.52-

8.56 (dd, 1H), 7.87-7.88 (s, 1H), 7.67-7.71(m, 2H), 4.78-4.80(d, 4H), 3.19-3.23(t, 4H), 2.12(s, 2H), 1.85-1.89(m, 4H), 0.96-1.52(m, 48H), 0.86-0.88(m, 6H), 0.74-0.80(m, 6H), 0.65-0.69(m, 6H). MALDI-TOF-MS calcd for C<sub>82</sub>H<sub>87</sub>ClF<sub>2</sub>N<sub>8</sub>O<sub>2</sub>S<sub>5</sub> (M<sup>+</sup>): 1448.521, found: 1450.199.

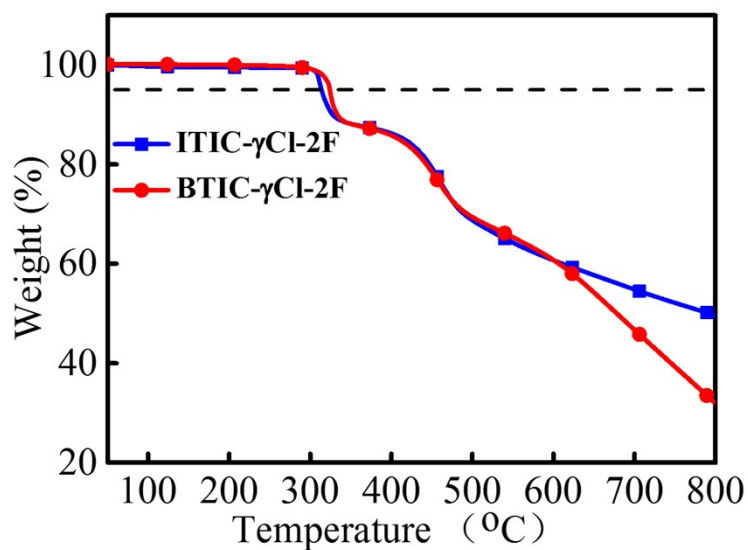

**Figure S1.** Thermogravimetric analysis (TGA) results of ITIC- $\gamma$ Cl-2F and BTIC- $\gamma$ Cl-2F with a heating rate of  $10\text{ }^{\circ}\text{C min}^{-1}$  under nitrogen purge.

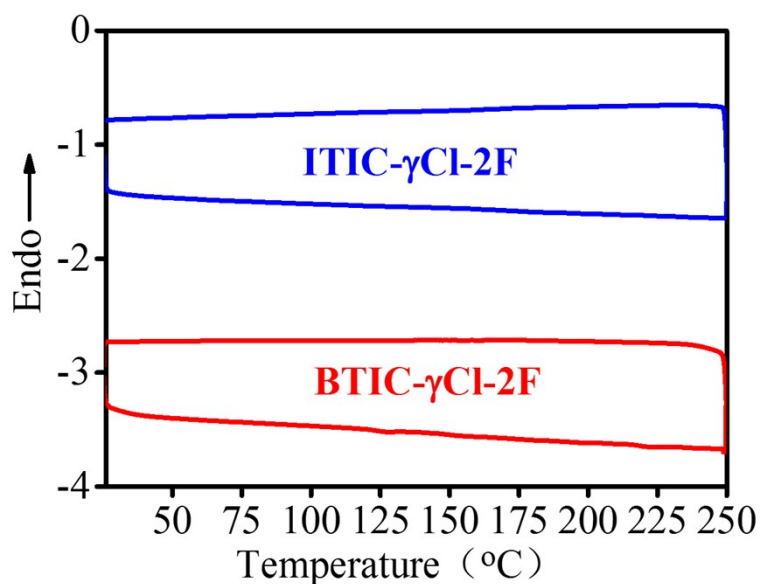

**Figure S2.** Differential scanning calorimetry (DSC) results of two molecules with heating and cooling rates of  $10\text{ }^{\circ}\text{C min}^{-1}$  under nitrogen purge.



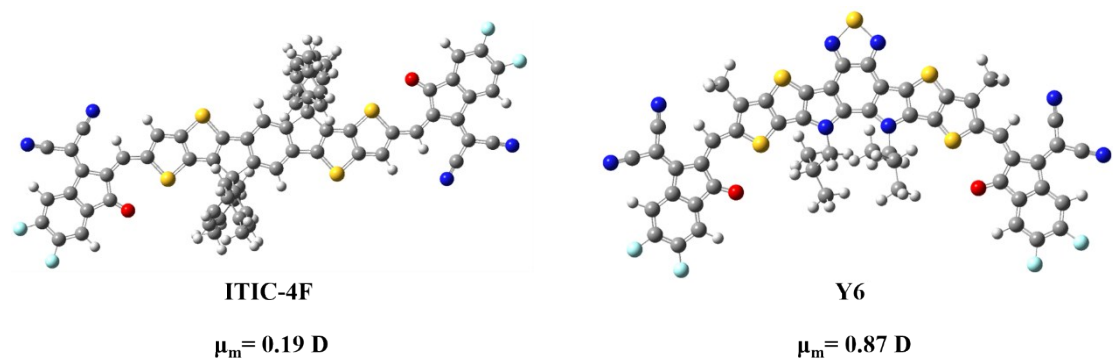

**Figure S3.** The dipole moments of ITIC-4F and Y6.

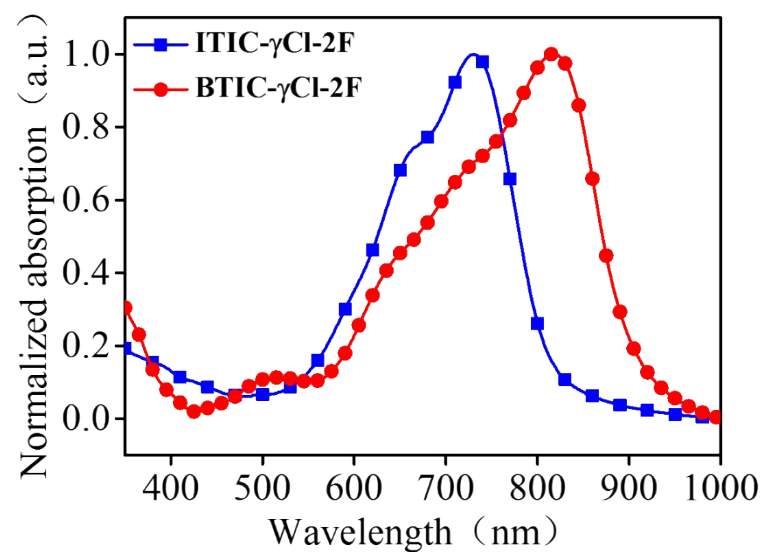

**Figure S4.** Normalized UV-vis absorption of two acceptors in films.

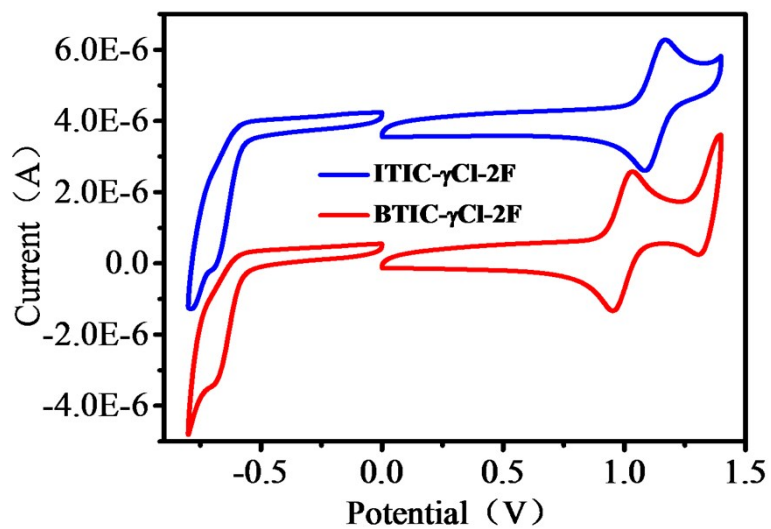

**Figure S5.** Cyclic voltammograms of two molecules in dichloromethane with (*n*-Bu)<sub>4</sub>NPF<sub>6</sub> (0.1 M) as supporting electrolyte, Pt wire as counter electrode, and Ag/Ag<sup>+</sup> as reference electrode.

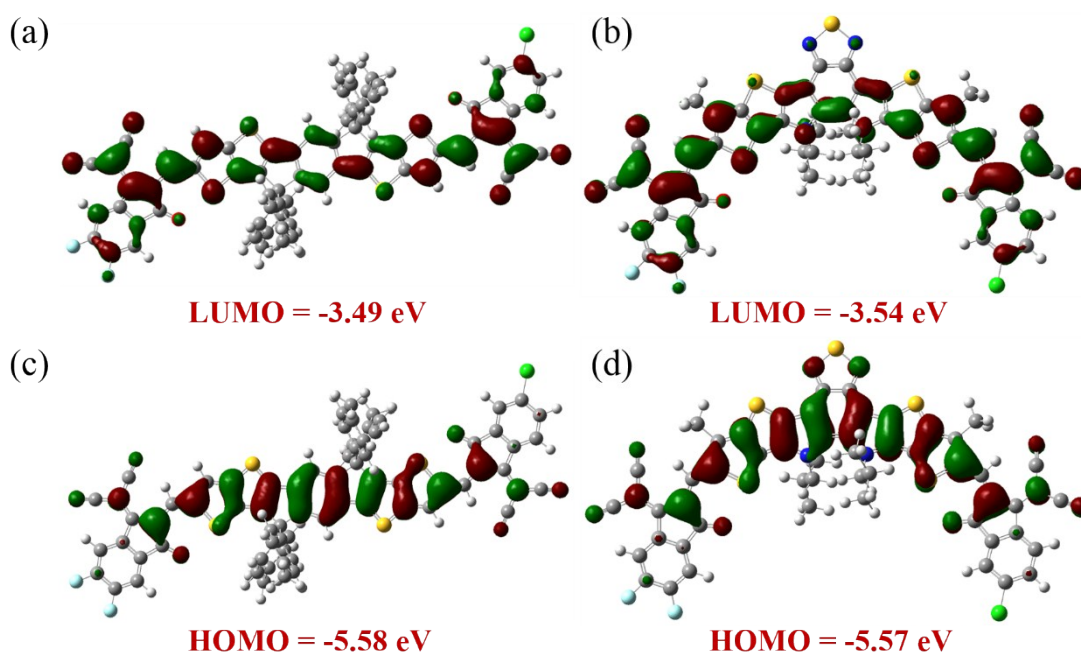

**Figure S6.** The density functional theory (DFT) calculation of molecules.

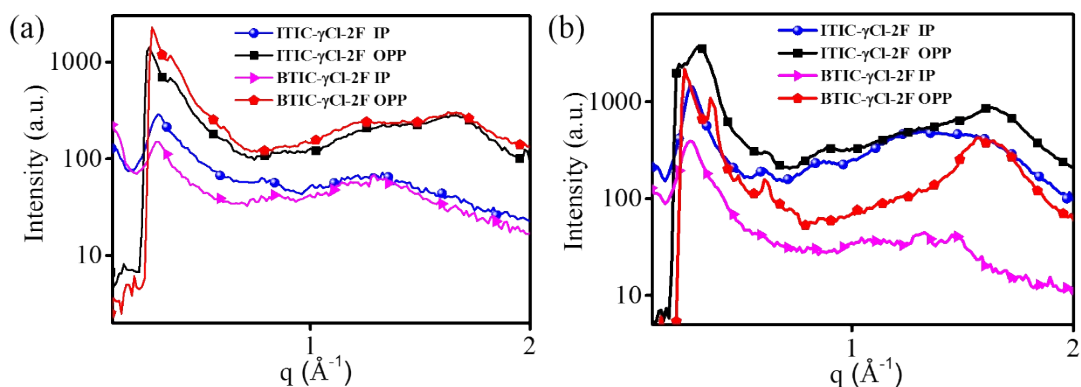

**Figure S7.** GIWAXS data of two acceptors-based neat films and blend films. (a) The intensity profiles of in-plane (IP) and out of plane (OPP) of four neat films, (b) The intensity profiles of IP and OPP of blend films.

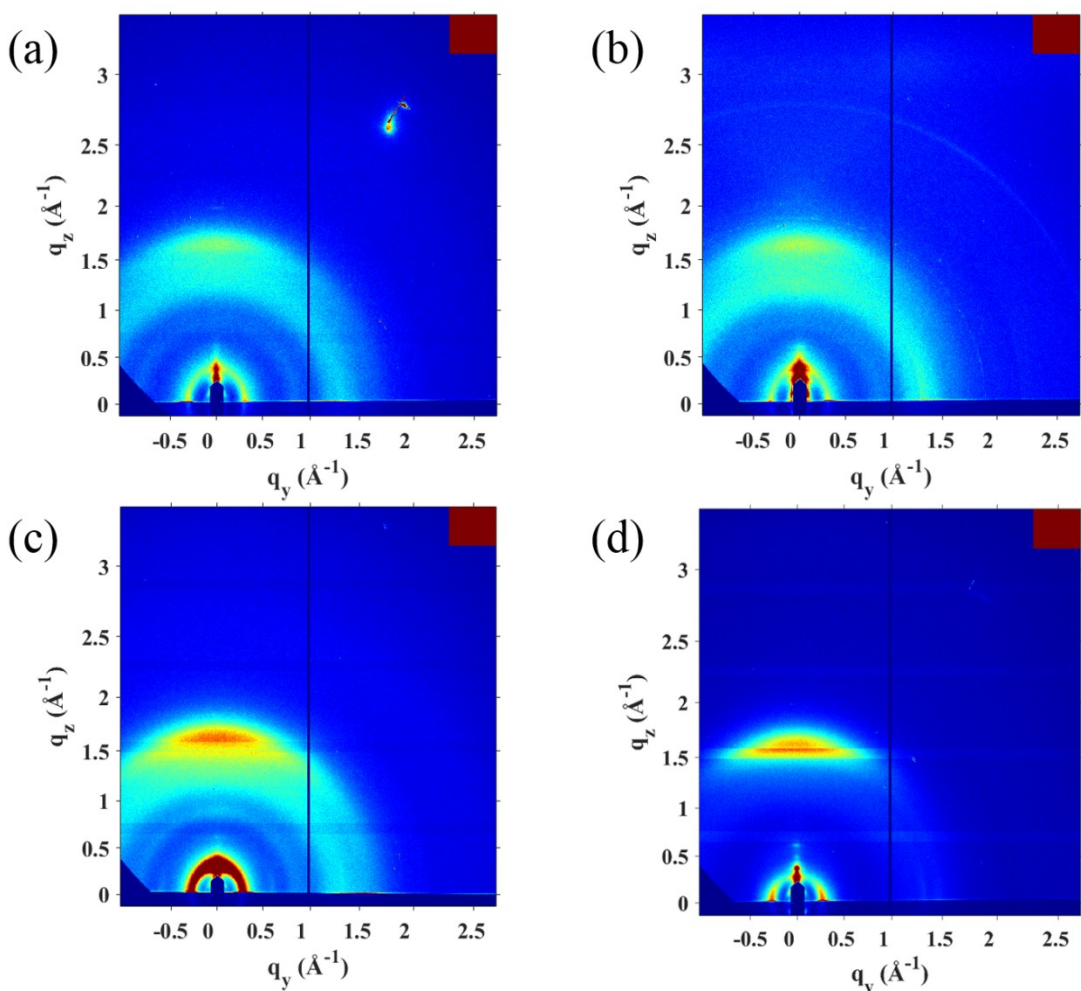

**Figure S8.** GIWAXS images of two acceptors-based neat films and blend films. (a) ITIC- $\gamma$ Cl-2F neat film, (b) BTIC- $\gamma$ Cl-2F neat film, (c) ITIC- $\gamma$ Cl-2F blend film, (d) BTIC- $\gamma$ Cl-2F blend film.

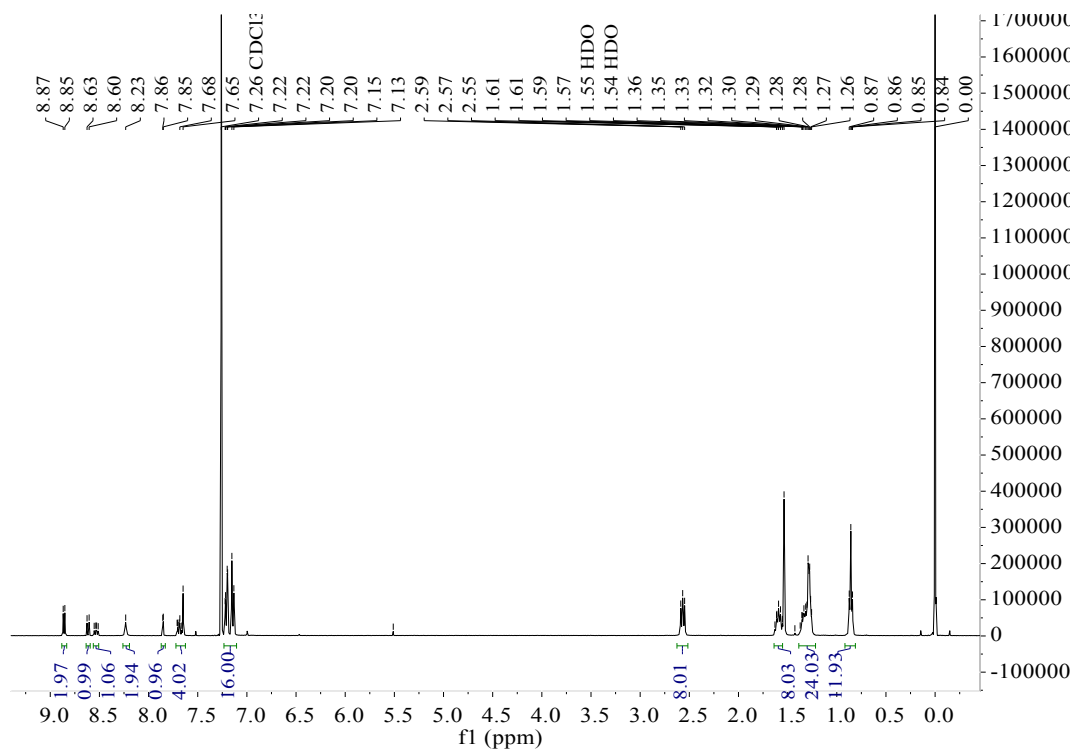

Figure S9. <sup>1</sup>H NMR of ITIC- $\gamma$ Cl-2F in CDCl<sub>3</sub>.

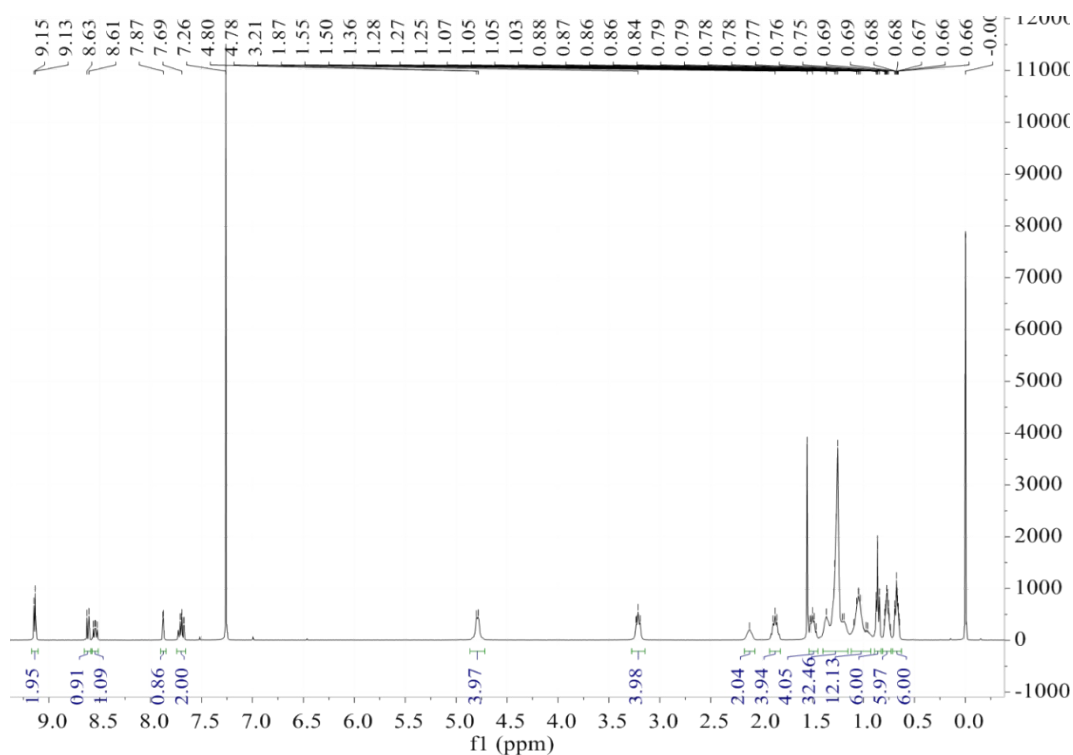

Figure S10. <sup>1</sup>H NMR of BTIC- $\gamma$ Cl-2F in CDCl<sub>3</sub>.

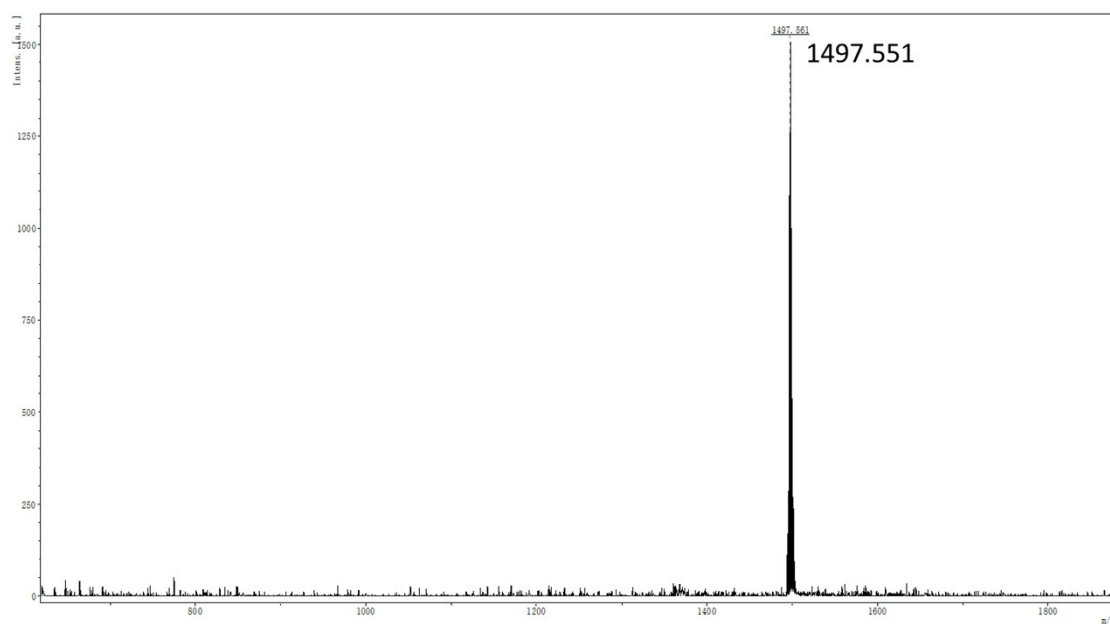

**Figure S11.** The MALDI-TOF-MS spectrum of **ITIC- $\gamma$ Cl-2F**.

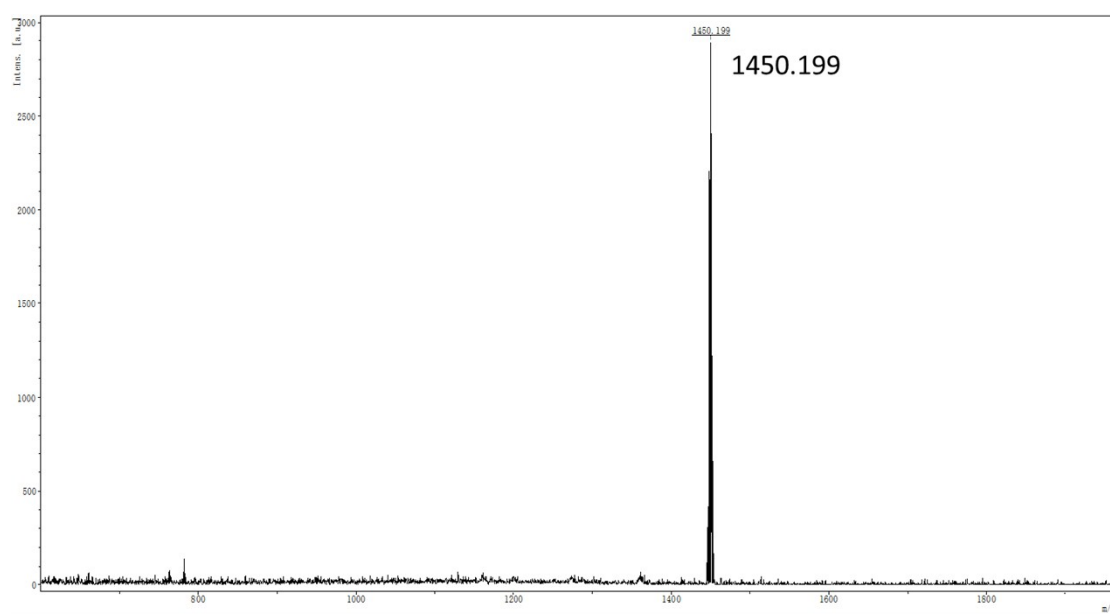

**Figure S12.** The MALDI-TOF-MS spectrum of **BTIC- $\gamma$ Cl-2F**.

## References

1. Mihailetschi, V. D., Wildeman, J., Blom, P. W. (2005). Space-Charge Limited Photocurrent. *Phys. Rev. Lett.* *94*, 126602-126605.
2. Davids, P. S., Campbell, I. H., Smith, D. L. (1997). Device Model for Single Carrier Organic Diodes. *J. Appl. Phys.* *82*, 6319-6325.
3. Lin, Y., Wang, J., Zhang, Z. G., Bai, H., Li, Y., Zhu, D., Zhan, X. (2015). An Electron Acceptor Challenging Fullerenes for Efficient Polymer Solar Cells. *Adv. Mater.* *27*, 1170-1174.
4. Yao, H., Cui, Y., Yu, R., Gao, B., Zhang, H., Hou, J. (2017). Design, Synthesis, and Photovoltaic Characterization of a Small Molecular Acceptor with an Ultra-Narrow Band Gap. *Angew. Chem. Int. Ed.* *56*, 3045-3049.
5. Li, Y., Lin, J.-D., Che, X., Qu, Y., Liu, F., Liao, L. S., Forrest, S. R. (2017). High Efficiency Near-Infrared and Semitransparent Non-Fullerene Acceptor Organic Photovoltaic Cells. *J. Am. Chem. Soc.* *139*, 17114-17119.
